# Supplementary material for: Single-Cell RNA Sequencing Reveals Characteristics of Myeloid Cells and Fibroblasts in RAS-Mutated Colorectal Cancer
Source: Research Square preprint supplement (doi:10.21203/rs.3.rs-6741598/v1), 2025-07-03
Supplement: Supplementary file 1 [file 4eb8054a885a2e298338671c.xlsx]

## Sheet: Sheet1
Supplementary Table 2 Antibodies list
Antibodies	Source	Identifier
CD163 (D6U1J) Rabbit mAb	CST	Cat# 93498S
CD3epsilon (D7A6E™) XP® Rabbit mAb	CST	Cat# 85061S
alpha-Smooth Muscle Actin (D4K9N) XP®Rabbit mAb	CST	Cat# 19245S
S-RMab®CK-Pan Recombinant Rabbit mAb (SDT-P001)	STARTER	Cat# S0B2118
Anti-CD1c antibody [OTI2F4]	Abcam	Cat# ab156708
ApoE (pan) (D7I9N) Rabbit mAb	CST	Cat# 13366S
Rabbit anti-MMP11 Polyclonal Antibody	Absin	Cat# abs146191
Rabbit polyclonal to CXCL14	Abcam	Cat# ab137541
Anti-RGS5 antibody [EPR28539-64]	Abcam	Cat# ab314670
VWF (D8L8G) XP®Rabbit mAb	CST	Cat# 65707S
