# Supplementary material for: Single-Cell RNA Sequencing Reveals Characteristics of Myeloid Cells and Fibroblasts in RAS-Mutated Colorectal Cancer
Source: Research Square preprint supplement (doi:10.21203/rs.3.rs-6741598/v1), 2025-07-03
Supplement: Supplementary file 2 [file eee73c45d696a8a1f1240463.xlsx]

## Sheet: Sheet1
Supplementary Table 3 Original data for mIHC statistical analysis
Name	CD163 positive cells & SMA positive cells average distance (μm)
202329016 (patient 10) CD163+SMA+CD3+panck	14.1768
202402086 (patient 21) CD163+SMA+CD3+panck	21.9689
F202308700 (patient 8) CD163+SMA+CD3+panck	12.2554
F202308689 (patient 6) CD163+SMA+CD3+panck	15.991
Name	CD1C positive cells & SMA positive cells average distance (μm)
202329016 (patient 10) CD1C+SMA+CD3+panck	14.7065
202402086 (patient 21) CD1C+SMA+CD3+panck	23.5366
F202308700 (patient 8) CD1C+SMA+CD3+panck	17.0308
F202308689 (patient 6) CD1C+SMA+CD3+panck	18.3087
Name	Total numbers of cells	CD1C positive cell numbers	Tissue area (mm²)
202329016 (patient 10) CD1C+panck	222679	16656	56.7969
202402086 (patient 21) CD1C+panck	413072	85202	82.7441
F202308689 (patient 6) CD1C+panck	130169	43176	28.8477
F202308700 (patient 8) CD1C+panck	439509	181743	95.4228
Name	Total numbers of cells	RGS5 positive cell numbers	Tissue area (mm²)
F202308700 (patient 8) CD3+RGS5+VWF+panck	454729	30031	119.397
202329016 (patient 10) CD3+RGS5+VWF+panck	253011	17738	61.1619
202402086 (patient 21) CD3+RGS5+VWF+panck	208560	92979	41.591
F202308689 (patient 6) CD3+RGS5+VWF+panck	93204	25444	22.9615
Name	Total numbers of cells	MMP11 positive cell numbers	CXCL14 positive cell numbers	SMA positive cell numbers	MMP11+CXCL14+SMA positive cell numbers	Tissue area (mm²)
202329016 (patient 10) SMA+MMP11+CXCL14+panck	123966	44009	104565	25334	9556	34.4569
202402086 (patient 21) SMA+MMP11+CXCL14+panck	329320	130130	123106	82046	17240	53.9044
F202308689 (patient 6) SMA+MMP11+CXCL14+panck	61273	2708	32291	390	21	11.817
F202308700 (patient 8) SMA+MMP11+CXCL14+panck	484543	86470	63535	111109	13425	122.777
Name	Total numbers of cells	CD10 positive cell numbers	SMA positive cell numbers	CD10+SMA positive cell numbers	Tissue area (mm²)
202329016 (patient 10) SMA+CD10+CD163+panck	243948	48520	40175	8328	58.2765
202402086 (patient 21) SMA+CD10+CD163+panck	256910	19841	8149	1324	54.0786
F202308700 (patient 8) SMA+CD10+CD163+panck	200489	23893	70150	11848	46.8564
F202308689 (patient 6) SMA+CD10+CD163+panck	62400	14900	24236	4387	14.0625
