# Supplementary material for: Single-Cell RNA Sequencing Reveals Characteristics of Myeloid Cells and Fibroblasts in RAS-Mutated Colorectal Cancer
Source: Research Square preprint supplement (doi:10.21203/rs.3.rs-6741598/v1), 2025-07-03
Supplement: Supplementary file 3 [file fa9465a1baec3cc09669cf0b.xlsx]

## Sheet: Sheet1
Supplementary Table 1 Clinical characteristics of CRC patients in this study
Characteristics	Pt1	Pt2	Pt3	Pt4	Pt6	Pt7	Pt8	Pt9	Pt10	Pt11	Pt15	Pt16	Pt17	Pt18	Pt19	Pt20	Pt21	Pt23
Tumor site	Colon	Rectum	Rectum	Colon	Colon	Colon	Colon	Colon	Colon	Colon	Rectum	Rectum	Rectum	Rectum	Rectum	Rectum	Colon	Colon
	ADC	ADC	ADC	ADC	ADC	ADC	ADC	ADC	ADC	ADC	ADC	ADC	ADC	ADC	ADC	ADC	ADC	ADC
pTNM: T	3	3	3	3	3	3	3	3	3	2	3	1	3	1	2	3	3	2
pTNM: N	2b	1b	2b	0	2a	0	0	0	0	0	0	0	0	0	0	1b	1a	0
pTNM: M	0	0	0	0	0	0	0	0	0	0	0	0	0	0	0	0	0	0
Stage	ⅢC	ⅢB	ⅢC	ⅡA	ⅢB	ⅡA	ⅡA	ⅡA	ⅡA	Ⅰ	ⅡA	Ⅰ	ⅡA	Ⅰ	Ⅰ	ⅢB	ⅢB	Ⅰ
Tumour size (cm3)	4.7*4.5*1.8	4.3*3.2*1.8	2.6*2*1	7*9*2.5	2.8*2.8*1	4*3.8*1.5	6*5.5*1	5.5*4*1.5	8.5*5.7*2.5	3.5*3.5*0.6	7.5*5*3	2.5*2*2.8	3.5*3*0.5	4*3.5*2	4.5*3.5*0.6	4.5*3*1.5	3*2*1.5	3*2.6*1.5
Mutations	KRAS Exon-2	Wild	Wild	Wild	NRAS Exon-3	Wild	KRAS Exon-2	Wild	KRAS Exon-4	KRAS Exon-2	Wild	KRAS Exon-2	KRAS Exon-2	KRAS Exon-2	KRAS Exon-2	KRAS Exon-2	Wild	Wild
MSI status	MSS	MSS	MSS	MSI	MSS	MSS	MSS	MSS	MSI	MSS	MSS	MSS	MSS	MSS	MSS	MSS	MSS	MSS
ADC, adenocarcinoma.
MSS, microsatellite stability; MSI, microsatellite instability.
